# Supplementary material for: A novel mesoporous silica-grafted organocatalyst for the Michael addition reaction, synthesized via the click method
Source: Royal Society of Chemistry journal article supplement (doi:10.1039/c0gc00788a), 2011-01-01

## **A novel mesoporous silica-grafted organocatalyst for the Michael addition reaction, synthesized *via* the click method**

**Suman L. Jain,<sup>[a]\*</sup> Arindam Modak,<sup>[b]</sup> Asim Bhaumik<sup>[b]\*</sup>**

<sup>[a]</sup>Chemical Sciences Division, Indian Institute of Petroleum (*Council of Scientific & Industrial Research*) Dehradun 248005, India

<sup>[b]</sup>Department of Materials Science, Indian Association for the Cultivation of Science, Jadavpur, Kolkata 700 032, India

\*Email: [suman@iip.res.in](mailto:suman@iip.res.in); [msab@iacs.res.in](mailto:msab@iacs.res.in)

### **Legend for figures**

- Figure S1. Small angle powder diffraction pattern of silica-clicked organocatalyst **1**
- Figure S2. N<sub>2</sub> adsorption/desorption isotherm of silica-clicked organocatalyst **1**. Pore size distribution is shown in the inset.
- Figure S3. FE SEM image of silica-clicked organocatalyst **1**.
- Figure S4. FTIR spectrum of mesoporous silica-clicked organocatalysts **1** (a) before immobilization (b) after immobilization (clear reduction in –N<sub>3</sub> band).

Figure S1

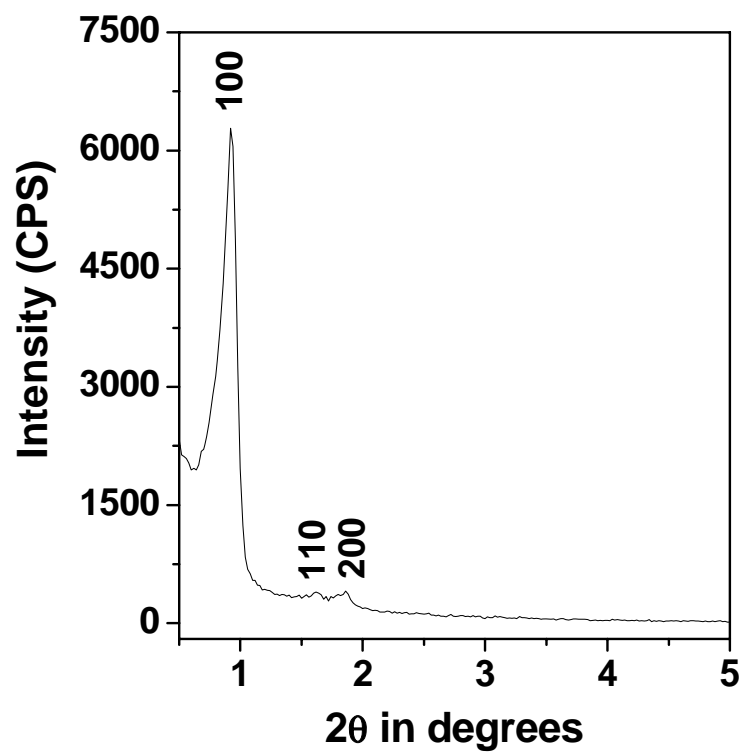

Figure S2

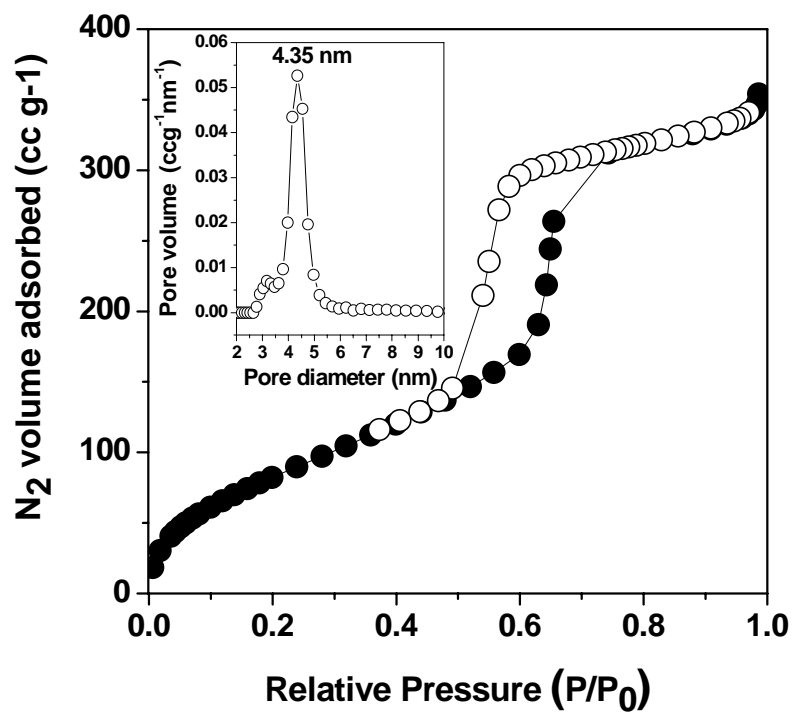

Figure S3

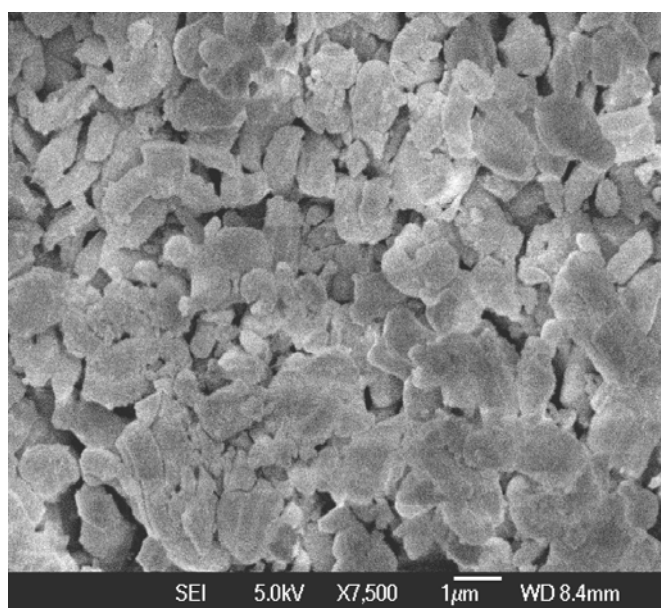

Figure S4

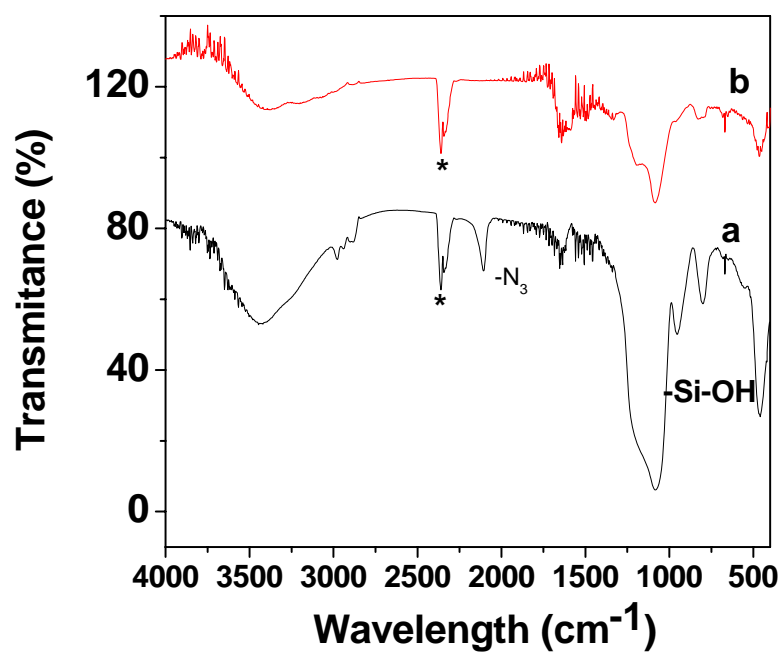

Supplement: c0gc00788a.pdf [file c0gc00788a.pdf]
